# Supplementary material
Source: publisher site journal article supplement (https://www.dovepress.com/article/294725)
Supplement: Supplementary file 1 [file get_supplementary_file.php]

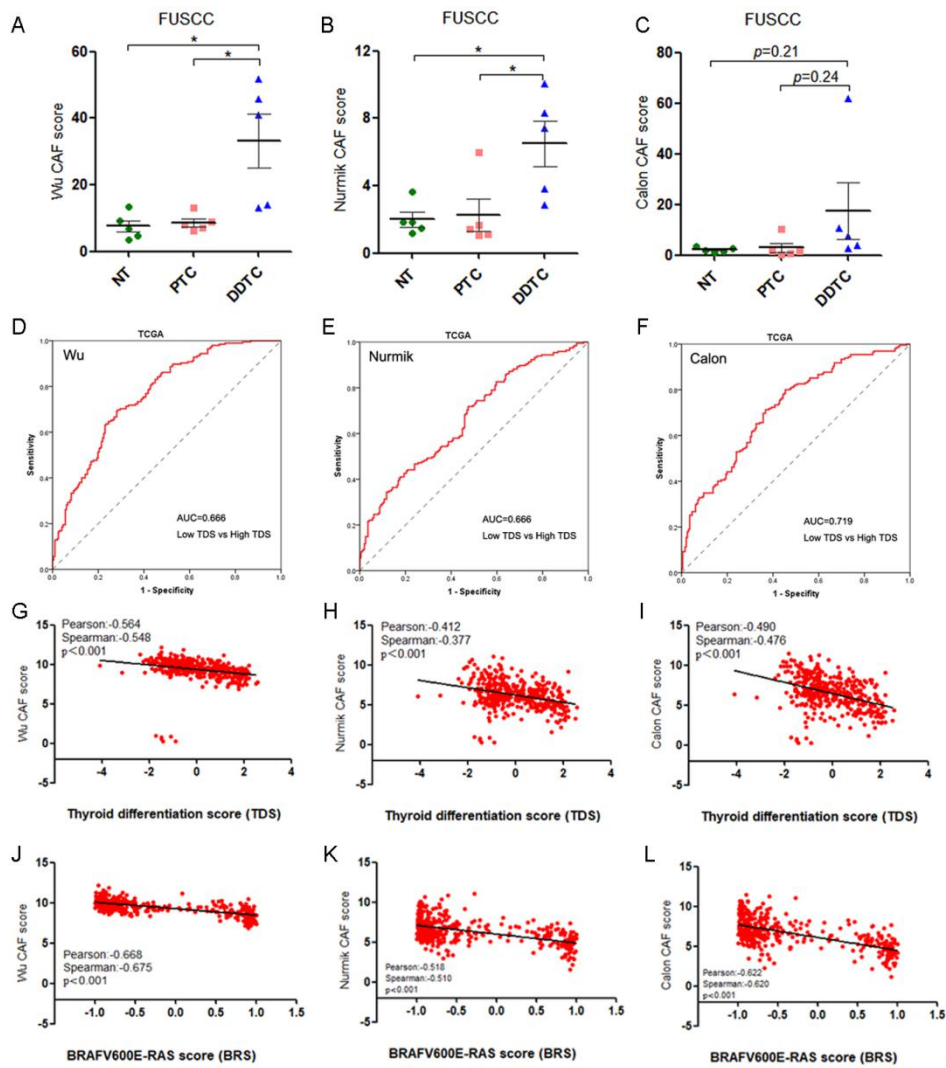

Supplementary Figure-S1 Correlations of the CAF score with DDTC, thyroid differentiation score (TDS) and BRAF-RAS score. (A) Comparison analyses of the CAF score among normal thyroid (NT) tissues, PTCs and dedifferentiated thyroid cancers (DDTCs). (B) Predictive effects of the CAF score for low-TDS patients in PTC. (C) Linear correlations of the CAF score with TDS. (D) Linear correlations of the CAF score with BRAF-RAS score. \* $p < 0.05$ , \*\* $p < 0.01$ , \*\*\* $p < 0.001$ .

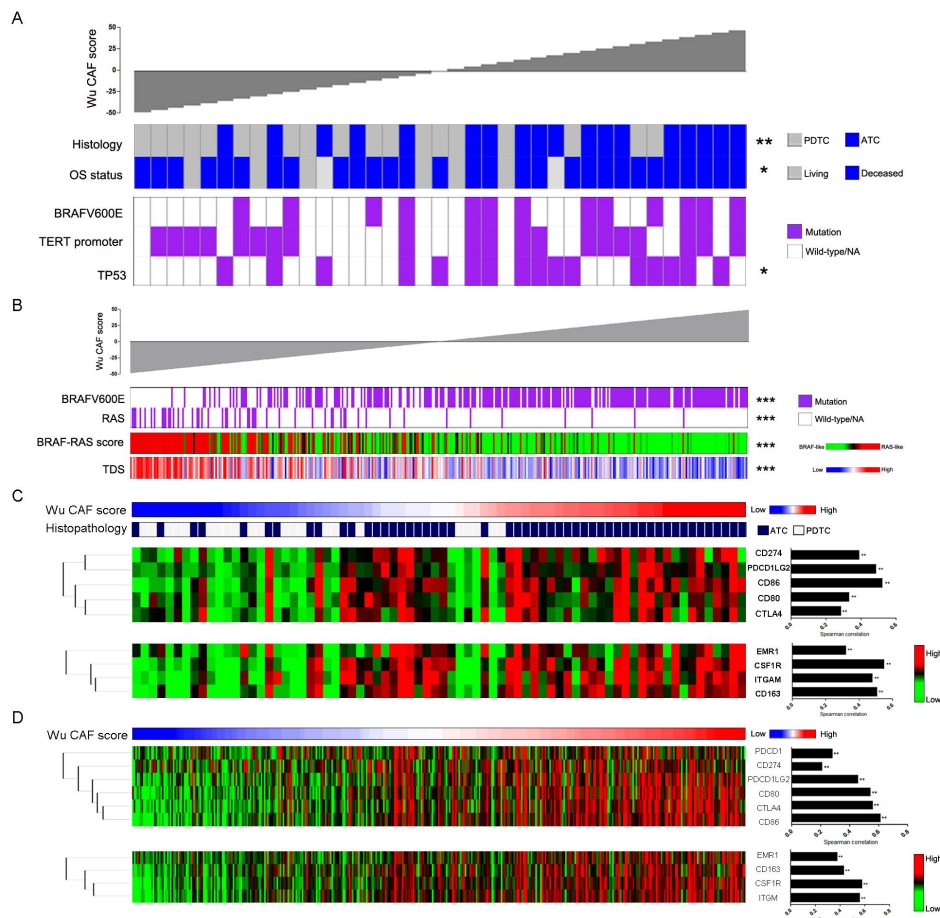

Supplementary Figure-S2 Correlations of the CAF score with genetic mutations and markers of tumor microenvironment based on the Wu CAF signature in thyroid cancer. (A) The DDTC patients from the GSE76039 cohort were ranked by histological subtypes, OS status,  $BRAF^{V600E}$  mutation,  $TERT$  promoter mutation and  $TP53$  mutation based on the CAF scores. (B) The PTC patients from the TCGA cohort were ranked by  $BRAF^{V600E}$  mutation,  $RAS$  mutation, BRAF-RAS score and thyroid differentiation score (TDS) based on the CAF scores. (C) The DDTC patients were ranked by the CAF score, histopathological subtypes, immune checkpoint markers and activated tumor-associated macrophage markers. (D) The PTC patients were ranked by the CAF score, immune checkpoint markers and activated tumor-associated macrophage markers. Spearman's correlation was performed to analyse the linear correlation of the CAF score with expression value of immune microenvironment markers. \* $p < 0.05$ , \*\* $p < 0.01$ , \*\*\* $p < 0.001$ .

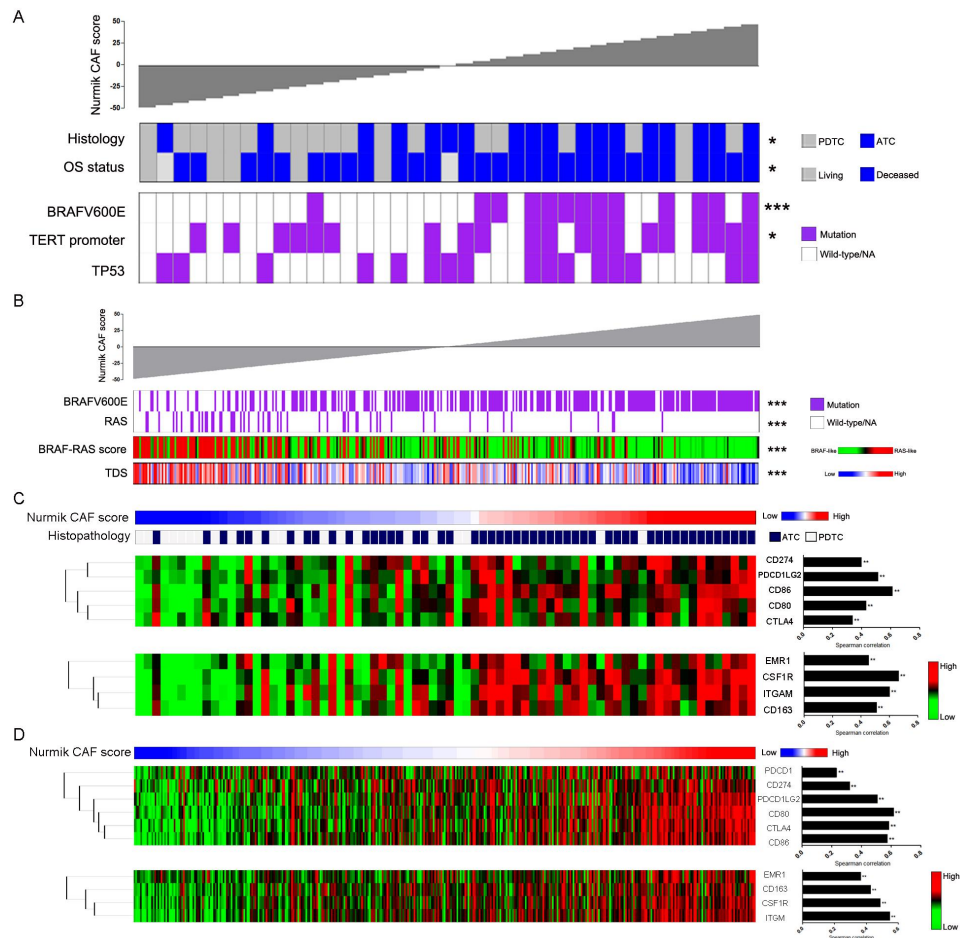

Supplementary Figure-S3 Correlations of the CAF score with genetic mutations and markers of tumor microenvironment based on the Nurmik CAF signature in thyroid cancer. (A) The DDTC patients from the GSE76039 cohort were ranked by histological subtypes, OS status, *BRAF*<sup>V600E</sup> mutation, *TERT* promoter mutation and *TP53* mutation based on the CAF score. (B) The PTC patients from the TCGA cohort were ranked by *BRAF*<sup>V600E</sup> mutation, *RAS* mutation, BRAF-RAS score and thyroid differentiation score (TDS) based on the CAF score. (C) The DDTC patients were ranked by the CAF score, histopathological subtypes, immune checkpoint markers and activated tumor-associated macrophage markers. (D) The PTC patients were ranked by the CAF score, immune checkpoint markers and activated tumor-associated macrophage markers. Spearman's correlation was performed to analyse the linear correlation of the CAF score with expression value of immune microenvironment markers. \* $p < 0.05$ , \*\* $p < 0.01$ , \*\*\* $p < 0.001$ .

**Supplementary Table-S1. Genes of the three CAF signatures used in this study**

| Study, author   | Year | Gene ID             |
|-----------------|------|---------------------|
| Xiaofen Wu      | 2017 | BMP4                |
|                 |      | MGP                 |
|                 |      | TGFBI               |
| Martin Nurmik   | 2020 | SPHK1               |
|                 |      | FAP                 |
|                 |      | $\alpha$ -SMA/ACTA2 |
|                 |      | MFAP5               |
|                 |      | COL11A1             |
|                 |      | TNNC1               |
|                 |      | PDPN                |
|                 |      | ITGA11              |
|                 |      | NG2/CSPG4           |
|                 |      | DCN                 |
| Alexandre Calon | 2015 | PDPN                |
|                 |      | FAP                 |
|                 |      |                     |

**Supplementary Table-S2. Gene expression profiles of the three CAF signatures in the FUSCC cohort**

| CAF signature | NT1         | NT2         | NT3         | NT4         | NT5         | PTC1        | PTC2        | PTC3        | PTC4        | PTC5        | DDTC1       | DDTC2       | DDTC3       | DDTC4       | DDTC5       |
|---------------|-------------|-------------|-------------|-------------|-------------|-------------|-------------|-------------|-------------|-------------|-------------|-------------|-------------|-------------|-------------|
| <b>Wu</b>     |             |             |             |             |             |             |             |             |             |             |             |             |             |             |             |
| MGP           | 67.72093026 | 107.7244784 | 147.6317897 | 100.217512  | 352.3428403 | 54.52420543 | 19.88099667 | 10.97174766 | 151.4559851 | 75.20430575 | 30.82467664 | 1.773269359 | 5.867657711 | 107.6121609 | 135.182382  |
| SPHK1         | 2.153683481 | 2.219300908 | 1.203868224 | 2.291832486 | 3.740262603 | 11.02379366 | 6.083673885 | 17.08590159 | 3.542197494 | 7.005052859 | 60.82563445 | 24.51280292 | 96.85958726 | 54.13917828 | 14.01448048 |
| BMP4          | 6.507451108 | 5.398120305 | 7.261060374 | 2.969060817 | 11.58658418 | 4.03359141  | 2.40739927  | 0.577042723 | 5.870666388 | 5.239395442 | 1.433249516 | 0.671489714 | 6.727515328 | 3.800996437 | 1.67980407  |
| TGFBI         | 2.597233927 | 13.12244825 | 6.462300573 | 4.319521567 | 15.28795104 | 4.840047398 | 20.67108345 | 6.583968377 | 8.601719663 | 5.24714606  | 397.5254258 | 318.8203057 | 154.4925965 | 27.87351992 | 14.12462585 |
| <b>Nurmik</b> |             |             |             |             |             |             |             |             |             |             |             |             |             |             |             |
| FAP           | 1.194851794 | 2.844740255 | 0.886484783 | 1.909860405 | 3.650135793 | 1.433730389 | 10.22251372 | 0.410746215 | 1.63615789  | 0.686455037 | 7.437553098 | 66.13975774 | 2.848043775 | 10.03860934 | 3.818230906 |
| ITGA11        | 0.70976239  | 0.883250564 | 1.123923179 | 0.766822445 | 3.418301553 | 1.055885037 | 5.957955157 | 0.616199925 | 1.982969927 | 1.414150974 | 1.928168311 | 2.473028149 | 13.42653241 | 7.063453737 | 2.118049657 |
| MFAP5         | 1.193498515 | 1.803877846 | 0.288743726 | 1.836366023 | 17.92617493 | 0.028019476 | 6.004758786 | 0.12542558  | 0.247233468 | 0.017651882 | 5.401614348 | 0.058381803 | 0.186487964 | 3.508794001 | 2.452395854 |
| CSPG4         | 4.817137652 | 1.28886892  | 2.207558207 | 2.987104611 | 11.03458734 | 2.028944684 | 2.988562053 | 5.84969623  | 10.69634177 | 8.402242771 | 35.44595924 | 8.32484723  | 25.92976101 | 4.245337047 | 7.682520085 |
| ACTA2         | 59.42431685 | 27.06682659 | 50.61065584 | 34.35177709 | 453.557658  | 50.22839004 | 50.83546991 | 67.82260384 | 102.0569004 | 96.0091639  | 117.3704778 | 15.29833697 | 27.31904584 | 61.63015644 | 56.36184708 |
| COL11A1       | 0.130967484 | 0.091859347 | 0.112116268 | 0.017391277 | 0.271856506 | 0.903013375 | 40.92985143 | 2.303580201 | 0.230395813 | 0.068540474 | 2.529582136 | 0.510053934 | 0.467888985 | 26.43311592 | 4.858868235 |
| PDPN          | 0.689640261 | 2.330967935 | 1.455579074 | 0.80735903  | 2.118880135 | 0.205452087 | 1.538954149 | 0.229919958 | 1.072592878 | 0.258863945 | 47.37861032 | 61.84462556 | 1.327973435 | 24.90653122 | 1.63299252  |
| TNNC1         | 1.624545554 | 1.851591304 | 5.649765469 | 0.175276322 | 1.757658745 | 0.986848262 | 1.559153976 | 1.12891648  | 0.516004927 | 8.772888411 | 0           | 0.114233996 | 0.449102324 | 0.2004542   | 1.64052392  |
| <b>Calon</b>  |             |             |             |             |             |             |             |             |             |             |             |             |             |             |             |
| FAP           | 1.194851794 | 2.844740255 | 0.886484783 | 1.909860405 | 3.650135793 | 1.433730389 | 10.22251372 | 0.410746215 | 1.63615789  | 0.686455037 | 7.437553098 | 66.13975774 | 2.848043775 | 10.03860934 | 3.818230906 |
| DCN           | 33.64805358 | 36.85757636 | 39.77660691 | 25.26793356 | 76.31068212 | 4.890310903 | 24.56319598 | 1.276550563 | 21.8470869  | 0.715818857 | 5.81129647  | 1.891677297 | 3.188094618 | 10.4980324  | 18.25824489 |
| PDPN          | 0.689640261 | 2.330967935 | 1.455579074 | 0.80735903  | 2.118880135 | 0.205452087 | 1.538954149 | 0.229919958 | 1.072592878 | 0.258863945 | 47.37861032 | 61.84462556 | 1.327973435 | 24.90653122 | 1.63299252  |

**Supplementary Table-S3. Clinicopathological characteristics and genetic alterations of PTC patients in the TCGA cohort**

| Variables                                     | TCGA (N=502)              |       |
|-----------------------------------------------|---------------------------|-------|
|                                               | N                         | %     |
| Age (years), mean $\pm$ SD (range)            | 47.18 $\pm$ 15.85 (15-89) |       |
| <b>Gender</b>                                 |                           |       |
| Male                                          | 135                       | 26.90 |
| Female                                        | 366                       | 72.90 |
| NA                                            | 1                         | 0.20  |
| <b>Multifocality</b>                          |                           |       |
| Unifocal                                      | 265                       | 52.80 |
| Multifocal                                    | 226                       | 45.00 |
| NA                                            | 11                        | 2.20  |
| <b>Coexistent HT</b>                          |                           |       |
| Yes                                           | 65                        | 12.90 |
| No                                            | 397                       | 79.10 |
| NA                                            | 40                        | 8.00  |
| <b>Histological subtypes</b>                  |                           |       |
| <b>Low-risk</b>                               |                           |       |
| Classical                                     | 356                       | 70.92 |
| Follicular                                    | 100                       | 19.92 |
| <b>Mixed papillary and follicular variant</b> | 1                         | 0.20  |
| Encapsulated follicular                       | 1                         | 0.20  |
| Columnar cell variant                         | 1                         | 0.20  |
| <b>High-risk</b>                              |                           |       |
| Tall cell variant                             | 36                        | 7.17  |
| Diffuse sclerosing variant                    | 4                         | 0.80  |
| <b>Cribriform morular variant</b>             | 2                         | 0.40  |
| NA                                            | 1                         | 0.20  |
| <b>ETE</b>                                    |                           |       |
| Yes                                           | 331                       | 65.90 |
| No                                            | 152                       | 30.30 |
| NA                                            | 19                        | 3.80  |
| <b>T Stage</b>                                |                           |       |
| T1-T2                                         | 308                       | 61.40 |
| T3-T4                                         | 190                       | 37.80 |
| NA                                            | 4                         | 0.80  |
| <b>LNM</b>                                    |                           |       |
| N0                                            | 227                       | 45.20 |

|                                    |                             |     |       |
|------------------------------------|-----------------------------|-----|-------|
|                                    | <b>N1</b>                   | 224 | 44.60 |
|                                    | <b>NA</b>                   | 51  | 10.20 |
| <b>Distant metastasis</b>          |                             |     |       |
|                                    | <b>M0</b>                   | 279 | 55.58 |
|                                    | <b>M1</b>                   | 9   | 1.79  |
|                                    | <b>MX</b>                   | 212 | 42.23 |
|                                    | <b>NA</b>                   | 2   | 0.40  |
| <b><i>BRAF</i><sup>V600E</sup></b> |                             |     |       |
|                                    | <b>Mutation</b>             | 239 | 47.60 |
|                                    | <b>Wild-type</b>            | 254 | 50.60 |
|                                    | <b>NA</b>                   | 9   | 1.80  |
| <b><i>RAS</i></b>                  |                             |     |       |
|                                    | <b><i>KRAS</i> mutation</b> | 3   | 0.59  |
|                                    | <b><i>NRAS</i> mutation</b> | 34  | 6.78  |
|                                    | <b><i>HRAS</i> mutation</b> | 14  | 2.79  |
|                                    | <b>Wild-type</b>            | 442 | 88.00 |
|                                    | <b>NA</b>                   | 9   | 1.80  |
| <b><i>EIF1AX</i></b>               |                             |     |       |
|                                    | <b>Mutation</b>             | 6   | 1.20  |
|                                    | <b>Wild-type</b>            | 487 | 97.00 |
|                                    | <b>NA</b>                   | 9   | 1.80  |
| <b><i>TERT</i> promoter</b>        |                             |     |       |
|                                    | <b>Mutation</b>             | 36  | 7.17  |
|                                    | <b>Wild-type</b>            | 360 | 71.71 |
|                                    | <b>NA</b>                   | 106 | 21.11 |
| <b><i>TERT</i> exon</b>            |                             |     |       |
|                                    | <b>Mutation</b>             | 2   | 0.40  |
|                                    | <b>Wild-type</b>            | 491 | 97.80 |
|                                    | <b>NA</b>                   | 9   | 1.80  |
| <b><i>ETV6_NTRK3</i></b>           |                             |     |       |
|                                    | <b>Fusion</b>               | 5   | 1.00  |
|                                    | <b>Wild-type</b>            | 488 | 97.20 |
|                                    | <b>NA</b>                   | 9   | 1.80  |
| <b><i>PAX8_PPARG</i></b>           |                             |     |       |
|                                    | <b>Fusion</b>               | 4   | 0.80  |
|                                    | <b>Wild-type</b>            | 489 | 97.40 |
|                                    | <b>NA</b>                   | 9   | 1.80  |
| <b><i>CCDC6_RET</i></b>            |                             |     |       |
|                                    | <b>Fusion</b>               | 21  | 4.20  |
|                                    | <b>Wild-type</b>            | 472 | 94.0  |

|                       |                  |     |       |
|-----------------------|------------------|-----|-------|
|                       | <b>NA</b>        | 9   | 1.80  |
| <b>BRAF-RAS score</b> |                  |     |       |
|                       | <b>BRAF-like</b> | 272 | 54.18 |
|                       | <b>RAS-like</b>  | 119 | 23.71 |
|                       | <b>NA</b>        | 111 | 22.11 |
| <b>TDS</b>            |                  |     |       |
|                       | <b>Low</b>       | 196 | 39.00 |
|                       | <b>High</b>      | 195 | 38.80 |
|                       | <b>NA</b>        | 111 | 22.10 |

---

Abbreviations: PTC, papillary thyroid cancer; TCGA, The Cancer Genomics Atlas; SD, standard deviation; NA, not available; HT, Hashimoto's thyroiditis; ETE, extrathyroidal extension; LNM, lymph node metastasis; CNA, copy number alteration; TDS, thyroid differentiation score.



**Supplementary Table-S4. Clinicopathological characteristics and genetic alterations of**

| Variables                          | GSE76039 (N=37)            |       |
|------------------------------------|----------------------------|-------|
|                                    | N                          | %     |
| Age (years), mean $\pm$ SD (range) | 65.51 $\pm$ 13.739 (27-87) |       |
| <b>Gender</b>                      |                            |       |
| Male                               | 3                          | 8.10  |
| Female                             | 12                         | 32.40 |
| NA                                 | 22                         | 59.50 |
| <b>Histology</b>                   |                            |       |
| PDTC                               | 19                         | 51.40 |
| ATC                                | 18                         | 48.60 |
| <b>T Stage</b>                     |                            |       |
| T1-T2                              | 2                          | 5.41  |
| T3-T4                              | 27                         | 72.97 |
| NA                                 | 8                          | 21.62 |
| <b>LNM</b>                         |                            |       |
| N0                                 | 10                         | 27.00 |
| N1                                 | 17                         | 45.90 |
| NA                                 | 10                         | 27.00 |
| <b>Distant metastasis</b>          |                            |       |
| M0                                 | 6                          | 16.20 |
| M1                                 | 17                         | 45.90 |
| NA                                 | 14                         | 37.80 |
| <b>Overall survival status</b>     |                            |       |
| Living                             | 6                          | 16.20 |
| Deceased                           | 29                         | 78.40 |
| NA                                 | 2                          | 5.40  |
| <b>Mutation count</b>              | 7.89 $\pm$ 7.263 (1-34)    |       |
| <b><i>BRAF</i><sup>V600E</sup></b> |                            |       |
| Mutation                           | 13                         | 35.10 |
| Wild-type                          | 24                         | 64.90 |
| <b><i>RAS</i></b>                  |                            |       |
| <i>KRAS</i> mutation               | 1                          | 2.70  |
| <i>NRAS</i> mutation               | 8                          | 21.62 |
| <i>HRAS</i> mutation               | 3                          | 8.11  |
| Wild-type                          | 25                         | 67.57 |

***EIF1AX***

**DDTC patients in the GSE76039 cohort**

|                               |                               |    |       |
|-------------------------------|-------------------------------|----|-------|
|                               | <b>Mutation</b>               | 5  | 13.51 |
|                               | <b>Wild-type</b>              | 32 | 86.49 |
| <b><i>TERT</i> promoter</b>   |                               |    |       |
|                               | <b>Mutation</b>               | 20 | 54.1  |
|                               | <b>Wild-type</b>              | 17 | 45.9  |
| <b><i>TP53</i></b>            |                               |    |       |
|                               | <b>Mutation</b>               | 16 | 43.20 |
|                               | <b>Wild-type</b>              | 21 | 56.80 |
| <b><i>PI3KCA/AKT/mTOR</i></b> |                               |    |       |
|                               | <b><i>PI3KCA</i> mutation</b> | 6  | 16.21 |
|                               | <b><i>AKT</i> mutation</b>    | 0  | 0.00  |
|                               | <b><i>PTEN</i> mutation</b>   | 2  | 5.41  |
|                               | <b><i>mTOR</i> mutation</b>   | 1  | 2.70  |
|                               | <b>Wild-type mutation</b>     | 28 | 75.68 |

---

Abbreviations: DDTC, dedifferentiated thyroid cancer; SD, standard deviation; NA, not available; PDTC, poorly differentiated thyroid cancer; ATC, anaplastic thyroid cancer; LNM, lymph node metastasis.

**Supplementary Table-S5. GSEA for the CAF signature score in the GEO cohort**

| <b>CAF signature score</b>                 | <b>NES</b> | <b>FDR q-val</b> |
|--------------------------------------------|------------|------------------|
| <b>Calon CAF score</b>                     |            |                  |
| HALLMARK_EPITHELIAL_MESENCHYMAL_TRANSITION | 2.984771   | <0.01            |
| HALLMARK_INFLAMMATORY_RESPONSE             | 2.8778832  | <0.01            |
| HALLMARK_ALLOGRAFT_REJECTION               | 2.8356714  | <0.01            |
| HALLMARK_INTERFERON_GAMMA_RESPONSE         | 2.8241003  | <0.01            |
| HALLMARK_TNFA_SIGNALING_VIA_NFKB           | 2.7830603  | <0.01            |
| HALLMARK_COMPLEMENT                        | 2.5933323  | <0.01            |
| HALLMARK_INTERFERON_ALPHA_RESPONSE         | 2.550976   | <0.01            |
| HALLMARK_IL6_JAK_STAT3_SIGNALING           | 2.5490294  | <0.01            |
| HALLMARK_KRAS_SIGNALING_UP                 | 2.4058788  | <0.01            |
| HALLMARK_ANGIOGENESIS                      | 2.282798   | <0.01            |
| HALLMARK_E2F_TARGETS                       | 2.2827501  | <0.01            |
| HALLMARK_APOPTOSIS                         | 2.2228875  | <0.01            |
| HALLMARK_COAGULATION                       | 2.2042973  | <0.01            |
| HALLMARK_IL2_STAT5_SIGNALING               | 2.085939   | <0.01            |
| HALLMARK_G2M_CHECKPOINT                    | 2.0686011  | <0.01            |
| HALLMARK_APICAL_JUNCTION                   | 2.012186   | <0.01            |
| HALLMARK_HYPOXIA                           | 1.9844944  | <0.01            |
| HALLMARK_UV_RESPONSE_DN                    | 1.873317   | 1.97E-04         |
| HALLMARK_P53_PATHWAY                       | 1.8237745  | 3.25E-04         |
| HALLMARK_MITOTIC_SPINDLE                   | 1.8208354  | 3.08E-04         |
| HALLMARK_MTORC1_SIGNALING                  | 1.7342595  | 8.92E-04         |
| HALLMARK_UV_RESPONSE_UP                    | 1.6706535  | 0.002207924      |
| HALLMARK_APICAL_SURFACE                    | 1.5978779  | 0.004459796      |
| HALLMARK_MYOGENESIS                        | 1.5482724  | 0.008008626      |
| HALLMARK_XENOBIOTIC_METABOLISM             | 1.5294921  | 0.009794958      |
| HALLMARK_TGF_BETA_SIGNALING                | 1.481768   | 0.016277058      |
| HALLMARK_ANDROGEN_RESPONSE                 | 1.4658471  | 0.018546786      |
| HALLMARK_GLYCOLYSIS                        | 1.4636691  | 0.018320376      |
| HALLMARK_ESTROGEN_RESPONSE_LATE            | 1.4211131  | 0.028063923      |
| HALLMARK_UNFOLDED_PROTEIN_RESPONSE         | 1.3702694  | 0.045256965      |
| <b>Nurmik CAF score</b>                    |            |                  |
| HALLMARK_EPITHELIAL_MESENCHYMAL_TRANSITION | 2.9978256  | <0.01            |
| HALLMARK_ALLOGRAFT_REJECTION               | 2.7955263  | <0.01            |
| HALLMARK_INFLAMMATORY_RESPONSE             | 2.7465005  | <0.01            |
| HALLMARK_INTERFERON_GAMMA_RESPONSE         | 2.7360613  | <0.01            |
| HALLMARK_TNFA_SIGNALING_VIA_NFKB           | 2.6307452  | <0.01            |
| HALLMARK_IL6_JAK_STAT3_SIGNALING           | 2.5523605  | <0.01            |
| HALLMARK_INTERFERON_ALPHA_RESPONSE         | 2.5047503  | <0.01            |

|                                    |           |             |
|------------------------------------|-----------|-------------|
| HALLMARK_COMPLEMENT                | 2.4488187 | <0.01       |
| HALLMARK_E2F_TARGETS               | 2.3340666 | <0.01       |
| HALLMARK_G2M_CHECKPOINT            | 2.329422  | <0.01       |
| HALLMARK_KRAS_SIGNALING_UP         | 2.2990816 | <0.01       |
| HALLMARK_ANGIOGENESIS              | 2.190217  | <0.01       |
| HALLMARK_COAGULATION               | 2.0774658 | <0.01       |
| HALLMARK_MITOTIC_SPINDLE           | 2.0588603 | <0.01       |
| HALLMARK_APICAL_JUNCTION           | 2.0572546 | <0.01       |
| HALLMARK_APOPTOSIS                 | 2.0099964 | <0.01       |
| HALLMARK_IL2_STAT5_SIGNALING       | 1.9991655 | <0.01       |
| HALLMARK_HYPOXIA                   | 1.8390589 | 7.53E-05    |
| HALLMARK_P53_PATHWAY               | 1.7857056 | 2.30E-04    |
| HALLMARK_UV_RESPONSE_DN            | 1.7748599 | 2.91E-04    |
| HALLMARK_MTORC1_SIGNALING          | 1.7596632 | 3.44E-04    |
| HALLMARK_MYOGENESIS                | 1.6354027 | 0.002597693 |
| HALLMARK_APICAL_SURFACE            | 1.5875857 | 0.004251962 |
| HALLMARK_HEDGEHOG_SIGNALING        | 1.5705903 | 0.004820215 |
| HALLMARK_UV_RESPONSE_UP            | 1.5204134 | 0.007838684 |
| HALLMARK_GLYCOLYSIS                | 1.4882275 | 0.011390877 |
| HALLMARK_NOTCH_SIGNALING           | 1.4279591 | 0.021120785 |
| HALLMARK_XENOBIOTIC_METABOLISM     | 1.4125174 | 0.023467543 |
| HALLMARK_ANDROGEN_RESPONSE         | 1.4041364 | 0.024803555 |
| HALLMARK_TGF_BETA_SIGNALING        | 1.3994099 | 0.02497839  |
| HALLMARK_UNFOLDED_PROTEIN_RESPONSE | 1.3776578 | 0.030293263 |
| HALLMARK_CHOLESTEROL_HOMEOSTASIS   | 1.333473  | 0.045656573 |

**Wu CAF score**

|                                            |           |       |
|--------------------------------------------|-----------|-------|
| HALLMARK_EPITHELIAL_MESENCHYMAL_TRANSITION | 3.321382  | <0.01 |
| HALLMARK_E2F_TARGETS                       | 3.0996614 | <0.01 |
| HALLMARK_TNFA_SIGNALING_VIA_NFKB           | 3.0554311 | <0.01 |
| HALLMARK_G2M_CHECKPOINT                    | 3.03104   | <0.01 |
| HALLMARK_ALLOGRAFT_REJECTION               | 2.9594667 | <0.01 |
| HALLMARK_INFLAMMATORY_RESPONSE             | 2.9281523 | <0.01 |
| HALLMARK_INTERFERON_GAMMA_RESPONSE         | 2.8667862 | <0.01 |
| HALLMARK_INTERFERON_ALPHA_RESPONSE         | 2.6953769 | <0.01 |
| HALLMARK_MITOTIC_SPINDLE                   | 2.6799238 | <0.01 |
| HALLMARK_IL6_JAK_STAT3_SIGNALING           | 2.6483963 | <0.01 |
| HALLMARK_COMPLEMENT                        | 2.6245914 | <0.01 |
| HALLMARK_KRAS_SIGNALING_UP                 | 2.532551  | <0.01 |
| HALLMARK_MTORC1_SIGNALING                  | 2.4995513 | <0.01 |
| HALLMARK_MYC_TARGETS_V1                    | 2.4988406 | <0.01 |
| HALLMARK_APOPTOSIS                         | 2.4183846 | <0.01 |
| HALLMARK_ANGIOGENESIS                      | 2.3088732 | <0.01 |

|                                     |           |             |
|-------------------------------------|-----------|-------------|
| HALLMARK_IL2_STAT5_SIGNALING        | 2.2797976 | <0.01       |
| HALLMARK_P53_PATHWAY                | 2.2401302 | <0.01       |
| HALLMARK_UV_RESPONSE_DN             | 2.237269  | <0.01       |
| HALLMARK_HYPOXIA                    | 2.2043593 | <0.01       |
| HALLMARK_MYC_TARGETS_V2             | 2.180035  | <0.01       |
| HALLMARK_UNFOLDED_PROTEIN_RESPONSE  | 2.1749065 | <0.01       |
| HALLMARK_APICAL_JUNCTION            | 2.1643062 | <0.01       |
| HALLMARK_UV_RESPONSE_UP             | 2.1026237 | <0.01       |
| HALLMARK_GLYCOLYSIS                 | 2.0964649 | <0.01       |
| HALLMARK_TGF_BETA_SIGNALING         | 2.0267172 | 5.16E-05    |
| HALLMARK_COAGULATION                | 1.963178  | 1.55E-04    |
| HALLMARK_DNA_REPAIR                 | 1.8629909 | 3.11E-04    |
| HALLMARK_CHOLESTEROL_HOMEOSTASIS    | 1.8585715 | 3.00E-04    |
| HALLMARK_WNT_BETA_CATENIN_SIGNALING | 1.7513405 | 9.13E-04    |
| HALLMARK_ANDROGEN_RESPONSE          | 1.745254  | 9.78E-04    |
| HALLMARK_ESTROGEN_RESPONSE_LATE     | 1.731877  | 0.001194931 |
| HALLMARK_APICAL_SURFACE             | 1.7276926 | 0.001253671 |
| HALLMARK_NOTCH_SIGNALING            | 1.572162  | 0.005994814 |
| HALLMARK_PI3K_AKT_MTOR_SIGNALING    | 1.5655571 | 0.006077498 |
| HALLMARK_ESTROGEN_RESPONSE_EARLY    | 1.5317363 | 0.008013841 |
| HALLMARK_MYOGENESIS                 | 1.4694945 | 0.014644829 |
| HALLMARK_HEDGEHOG_SIGNALING         | 1.4131165 | 0.025254091 |
| HALLMARK_XENOBIOTIC_METABOLISM      | 1.4090146 | 0.025649486 |
| HALLMARK_PROTEIN_SECRETION          | 1.3775179 | 0.034286644 |

---

**Supplementary Table-S6. GSEA for the CAF signature score in the TCGA cohort**

| <b>CAF signature score</b>                 | <b>NES</b> | <b>FDR q-val</b> |
|--------------------------------------------|------------|------------------|
| <b>Calon CAF score</b>                     |            |                  |
| HALLMARK_ALLOGRAFT_REJECTION               | 1.9949901  | <0.01            |
| HALLMARK_EPITHELIAL_MESENCHYMAL_TRANSITION | 1.9652183  | <0.01            |
| HALLMARK_INFLAMMATORY_RESPONSE             | 1.9548606  | <0.01            |
| HALLMARK_INTERFERON_GAMMA_RESPONSE         | 1.8912655  | <0.01            |
| HALLMARK_TNFA_SIGNALING_VIA_NFKB           | 1.8712671  | <0.01            |
| HALLMARK_KRAS_SIGNALING_UP                 | 1.7765495  | <0.01            |
| HALLMARK_INTERFERON_ALPHA_RESPONSE         | 1.7631664  | <0.01            |
| HALLMARK_IL6_JAK_STAT3_SIGNALING           | 1.7263116  | <0.01            |
| HALLMARK_IL2_STAT5_SIGNALING               | 1.7116135  | 1.04E-04         |
| HALLMARK_COMPLEMENT                        | 1.6481407  | 2.76E-04         |
| HALLMARK_ANGIOGENESIS                      | 1.6337253  | 3.34E-04         |
| HALLMARK_G2M_CHECKPOINT                    | 1.6095858  | 6.11E-04         |
| HALLMARK_COAGULATION                       | 1.6020452  | 6.36E-04         |
| HALLMARK_APOPTOSIS                         | 1.5881389  | 9.83E-04         |
| HALLMARK_APICAL_JUNCTION                   | 1.5324992  | 0.002879546      |
| HALLMARK_E2F_TARGETS                       | 1.5167933  | 0.003674479      |
| HALLMARK_MITOTIC_SPINDLE                   | 1.4248508  | 0.014652742      |
| HALLMARK_KRAS_SIGNALING_DN                 | 1.4203945  | 0.014855285      |
| HALLMARK_ESTROGEN_RESPONSE_LATE            | 1.392818   | 0.02118957       |
| HALLMARK_APICAL_SURFACE                    | 1.385867   | 0.02183633       |
| HALLMARK_P53_PATHWAY                       | 1.3751973  | 0.024297427      |
| HALLMARK_UV_RESPONSE_DN                    | 1.3635736  | 0.027068948      |
| <b>Nurmik CAF score</b>                    |            |                  |
| HALLMARK_EPITHELIAL_MESENCHYMAL_TRANSITION | 1.8438131  | <0.01            |
| HALLMARK_ALLOGRAFT_REJECTION               | 1.8338305  | <0.01            |
| HALLMARK_INFLAMMATORY_RESPONSE             | 1.8278651  | <0.01            |
| HALLMARK_INTERFERON_GAMMA_RESPONSE         | 1.7155617  | <0.01            |
| HALLMARK_TNFA_SIGNALING_VIA_NFKB           | 1.7122353  | <0.01            |
| HALLMARK_KRAS_SIGNALING_UP                 | 1.673658   | 1.57E-04         |
| HALLMARK_IL6_JAK_STAT3_SIGNALING           | 1.6381247  | 4.03E-04         |
| HALLMARK_ANGIOGENESIS                      | 1.6353917  | 3.53E-04         |
| HALLMARK_INTERFERON_ALPHA_RESPONSE         | 1.6126686  | 5.29E-04         |
| HALLMARK_IL2_STAT5_SIGNALING               | 1.6074618  | 4.76E-04         |
| HALLMARK_COAGULATION                       | 1.5755605  | 6.92E-04         |
| HALLMARK_COMPLEMENT                        | 1.5641097  | 7.96E-04         |
| HALLMARK_APOPTOSIS                         | 1.5123887  | 0.001828536      |
| HALLMARK_APICAL_JUNCTION                   | 1.4698442  | 0.004953782      |
| HALLMARK_UV_RESPONSE_DN                    | 1.4264145  | 0.010394453      |
| HALLMARK_KRAS_SIGNALING_DN                 | 1.3959996  | 0.016334955      |

|                                            |           |             |
|--------------------------------------------|-----------|-------------|
| HALLMARK_ESTROGEN_RESPONSE_LATE            | 1.378591  | 0.018609487 |
| HALLMARK_APICAL_SURFACE                    | 1.3678466 | 0.021008836 |
| HALLMARK_G2M_CHECKPOINT                    | 1.3607527 | 0.022146618 |
| HALLMARK_P53_PATHWAY                       | 1.317818  | 0.040031724 |
| HALLMARK_MYOGENESIS                        | 1.3066779 | 0.044095755 |
| HALLMARK_MITOTIC_SPINDLE                   | 1.3008221 | 0.04559826  |
| HALLMARK_E2F_TARGETS                       | 1.3002547 | 0.04378004  |
| <b>Wu CAF score</b>                        |           |             |
| HALLMARK_ALLOGRAFT_REJECTION               | 2.2163436 | <0.01       |
| HALLMARK_EPITHELIAL_MESENCHYMAL_TRANSITION | 2.084185  | <0.01       |
| HALLMARK_INFLAMMATORY_RESPONSE             | 2.068243  | <0.01       |
| HALLMARK_INTERFERON_GAMMA_RESPONSE         | 2.030704  | <0.01       |
| HALLMARK_TNFA_SIGNALING_VIA_NFKB           | 1.9751998 | <0.01       |
| HALLMARK_INTERFERON_ALPHA_RESPONSE         | 1.9425185 | <0.01       |
| HALLMARK_KRAS_SIGNALING_UP                 | 1.8719102 | <0.01       |
| HALLMARK_IL6_JAK_STAT3_SIGNALING           | 1.8241647 | 1.17E-04    |
| HALLMARK_COAGULATION                       | 1.788996  | 2.08E-04    |
| HALLMARK_COMPLEMENT                        | 1.7858615 | 1.87E-04    |
| HALLMARK_IL2_STAT5_SIGNALING               | 1.7838882 | 1.70E-04    |
| HALLMARK_ANGIOGENESIS                      | 1.7750955 | 2.36E-04    |
| HALLMARK_APOPTOSIS                         | 1.6812643 | 5.67E-04    |
| HALLMARK_APICAL_JUNCTION                   | 1.5608996 | 0.003880591 |
| HALLMARK_P53_PATHWAY                       | 1.4813607 | 0.012458951 |
| HALLMARK_ESTROGEN_RESPONSE_LATE            | 1.4709675 | 0.01371656  |
| HALLMARK_KRAS_SIGNALING_DN                 | 1.440713  | 0.019081507 |
| HALLMARK_E2F_TARGETS                       | 1.4317158 | 0.020748567 |
| HALLMARK_G2M_CHECKPOINT                    | 1.4215562 | 0.022300782 |

---

**Supplementary Table-S7. Overlapped signaling pathways of GSEA analyses in both GEO and TCGA**

---

**Biological signaling pathways**

---

HALLMARK\_ALLOGRAFT\_REJECTION  
HALLMARK\_EPITHELIAL\_MESENCHYMAL\_TRANSITION  
HALLMARK\_INFLAMMATORY\_RESPONSE  
HALLMARK\_INTERFERON\_GAMMA\_RESPONSE  
HALLMARK\_TNFA\_SIGNALING\_VIA\_NFKB  
HALLMARK\_KRAS\_SIGNALING\_UP  
HALLMARK\_INTERFERON\_ALPHA\_RESPONSE  
HALLMARK\_IL6\_JAK\_STAT3\_SIGNALING  
HALLMARK\_IL2\_STAT5\_SIGNALING  
HALLMARK\_COMPLEMENT  
HALLMARK\_ANGIOGENESIS  
HALLMARK\_G2M\_CHECKPOINT  
HALLMARK\_COAGULATION  
HALLMARK\_APOPTOSIS  
HALLMARK\_APICAL\_JUNCTION  
HALLMARK\_E2F\_TARGETS  
HALLMARK\_P53\_PATHWAY

---
